# Supplementary material
Source: Springer Nature journal article supplement (https://www.springermedizin.de/resource/supplementary/12968_2009_960_MOESM1_ESM.pdf/9580050)
Supplement: MOESM1 [file 9580050]

263 citations retrieved from  
database and literature searches

208 irrelevant citations excluded

55 relevant publications identified

20 papers rejected according to  
inclusion / exclusion criteria

35 studies included in the meta-  
analysis
